# Supplementary material for: Adaptive sparse matrix representation for efficient matrix–vector multiplication
Source: Springer Nature journal article supplement (doi:10.1007/s11227-015-1571-0), 2015-11-28
Supplement: 11227_2015_1571_MOESM1_ESM.pdf [file 11227_2015_1571_MOESM1_ESM.pdf]

## APPENDIX A. ANALYSES UNDER FERMI PLATFORM

This appendix contains the results of using auto-tuner for Fermi platform. Results show that our adaptive scheme improves the performance of sparse matrix multiplications by  $1.8\times$  for single-precision and  $1.4\times$  for double-precision formats.

### A.1 Experiments to Set Parameters

In this section, we first analyze the performance gain achieved for the basic formats under different architectural configurations. Table I shows the best architectural configuration for each format. All experiments throughout this study are conducted on GTX480 with 480 cores. It works with a clock frequency of 1.4GHz, and has 1.5 GB DRAM with 177GB/s bandwidth. Nvidia CUDA SDK 6.5 was used for all experiments.

TABLE A. I. THE BEST CONFIGURATION TO ACHIVED BEST PERFORMANCE FOR EACH FORMAT

| Formats     | Block Size | Register (Single-Double) | Memory |
|-------------|------------|--------------------------|--------|
| DIA         | 512        | 20-33                    | L1     |
| ELLPACK     | 512        | 20-33                    | L1     |
| COO         | 128        | 20-33                    | L1     |
| CSR(single) | 64         | 20-33                    | L1     |
| CSR(vector) | 512        | 20-33                    | L1     |

#### A.1.1 Block Size

The impact of block-size on the performance is shown in Fig.A.1. In this figure, the best performance for ELL, DIA and CSR-vector formats is achieved with 512 threads inside a block. Considering the maximum number of blocks inside an SM which is 8 and the number of active threads inside an SM (i.e., 1536), the number of active threads will be 1536 (for compute capability 2.x) and occupancy degree equals 100%.

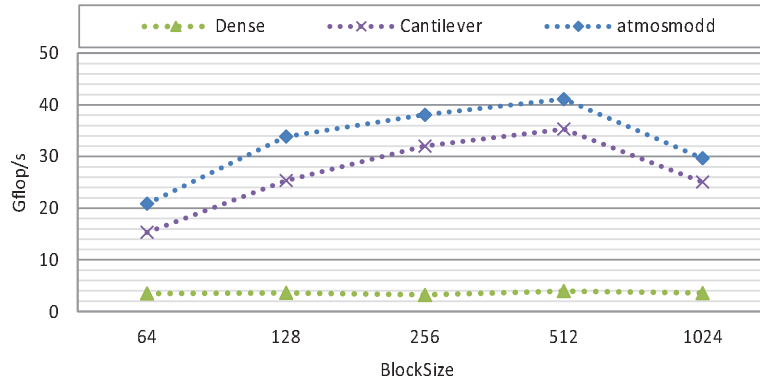

(a) DIA format

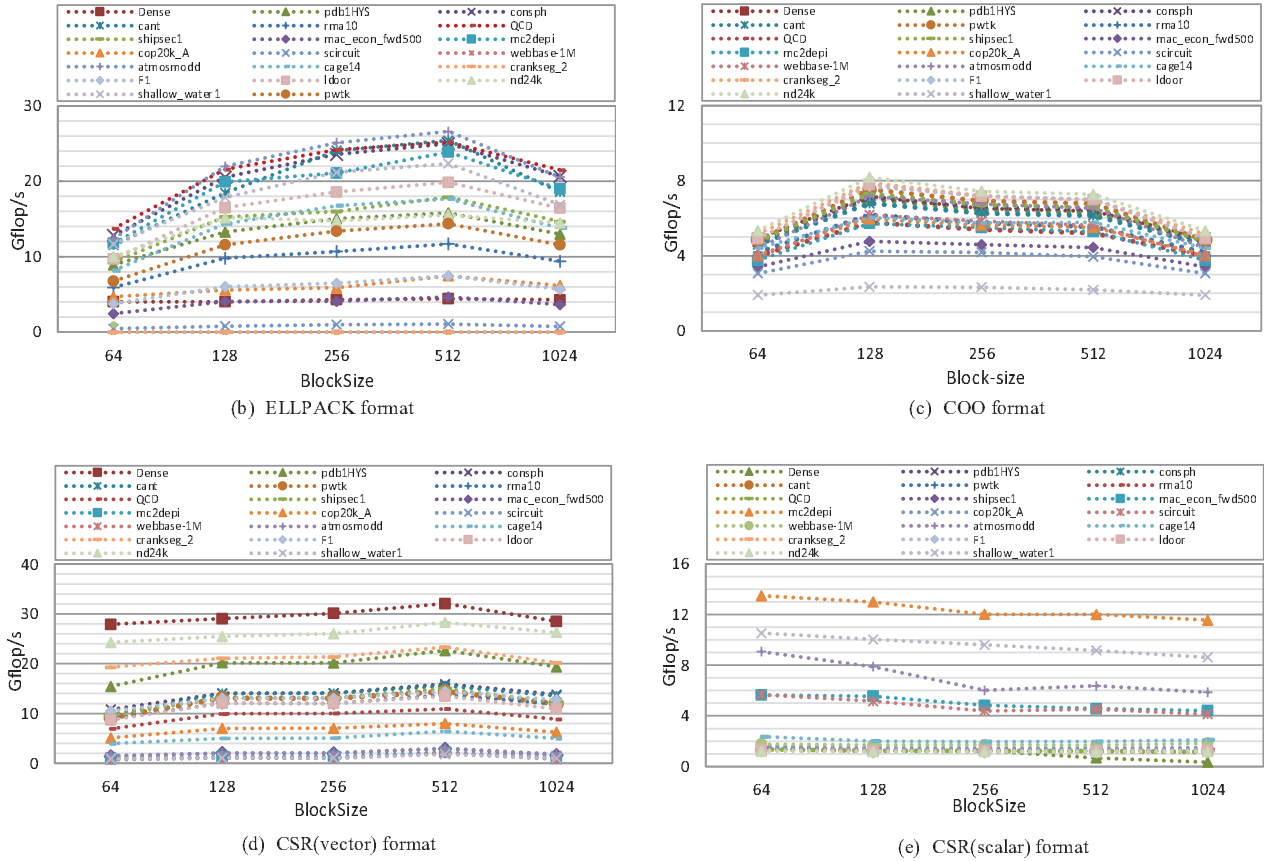

Fig A.1. The performance achieved by basic formats for different blocks sizes

### A.1.2 Number of Registers

Effective register allocation has become a key to major improvements in program performance. Fig.A.2. shows the effect of the number of allocated registers on SpMV performance. As shown in the figure, as expected, by decreasing the number of allocated registers, a significant improvement in SpMV performance can be achieved without increasing the number of total spills. Table II shows the measure of occupancy by the limited number of registers of each SM (i.e., 32768 for compute capability 2.x). Regardless of block-size, the compiler allocates 27 and 33 registers to each thread for single and double-precision computation, respectively.

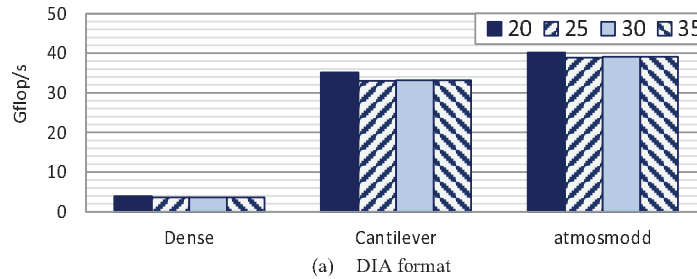

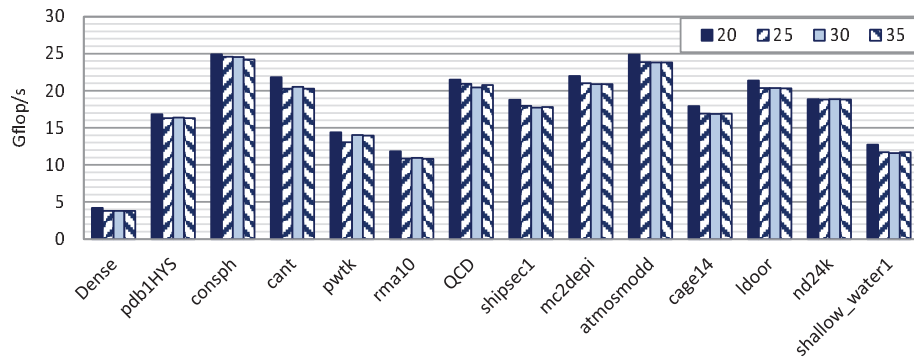

(b) ELLPACK format

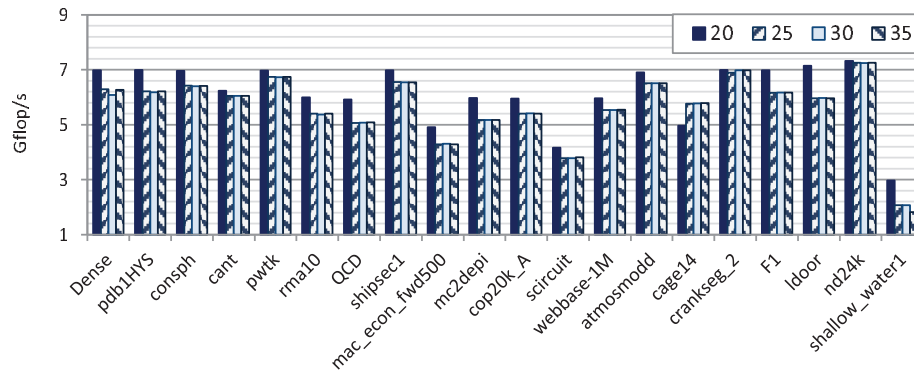

(c) COO format

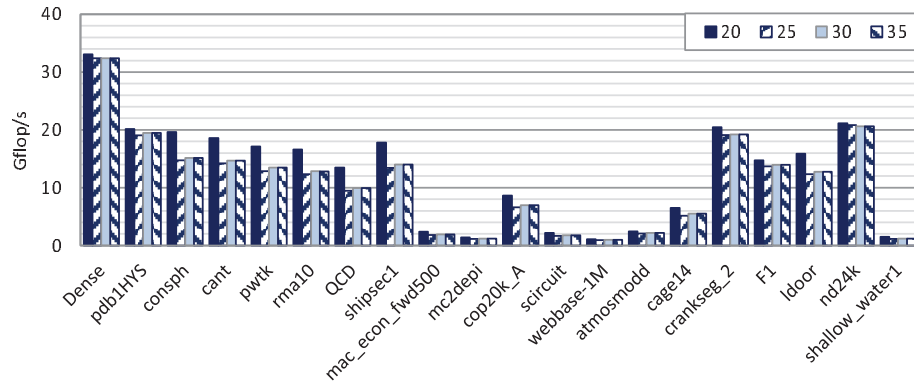

(d) CSR(vector) format

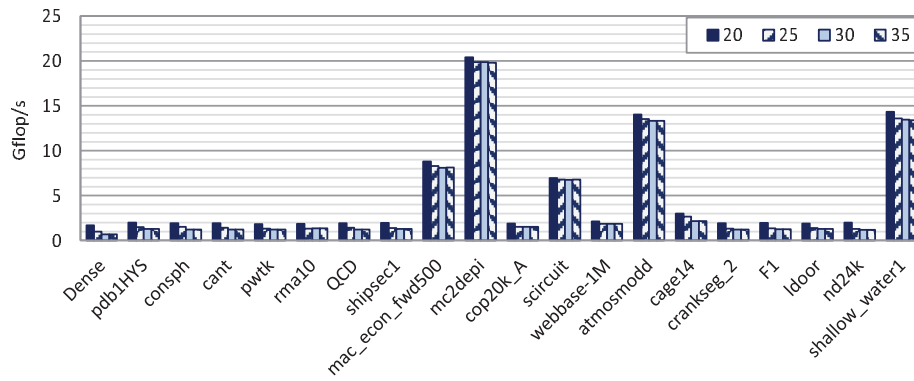

(e) CSR(scalar) format

Fig A. 2. The effect of the number of registers on the performance for basic formats

TABLE I. OCCUPANCY RATE FOR DIFFERENT NUMBER OF ALLOCATED REGISTERS

| Number of Registers                | 20  | 25 | 30 | 35 |
|------------------------------------|-----|----|----|----|
| Occupancy for Single Precision (%) | 100 | 66 | 66 | 66 |
| Occupancy for Double Precision (%) | 100 | 66 | 66 | 33 |

### A.1.3 Memory Hierarchy

The impact of memory configuration on the performance is shown in Fig A.3 and Fig A.4. It is worth mentioning that Fermi architecture does not support the new setting of 32KB shared-memory/32KB L1-cache. As shown in the figures, the performance of CSR(vector) increases when the size of L1 cache is set to 48KB.

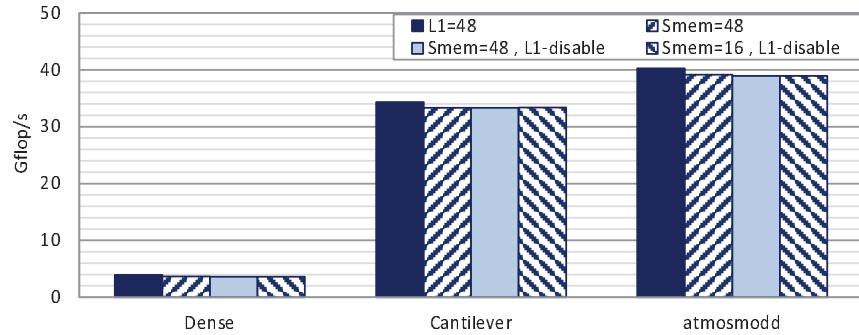

(a) DIA format

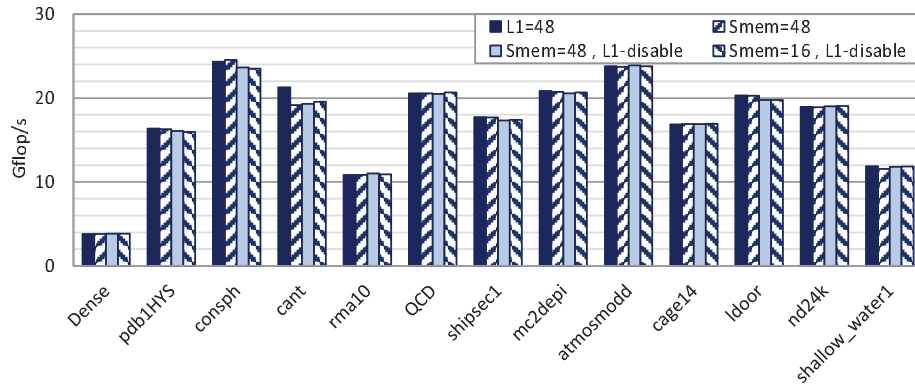

(b) ELLPACK format

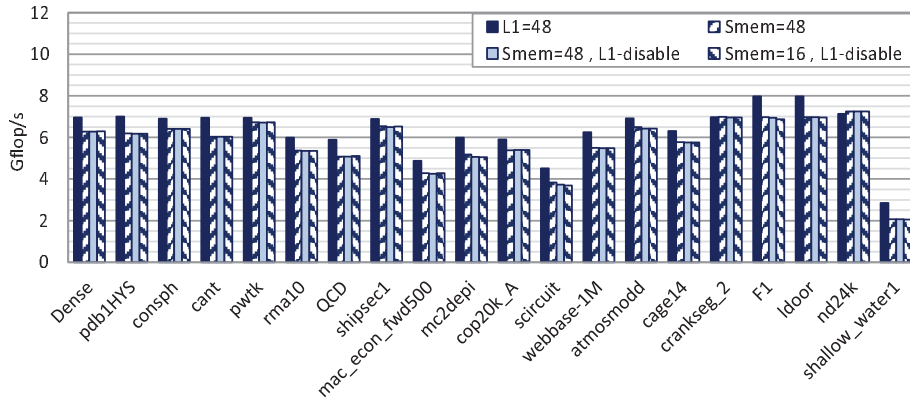

(c) COO format

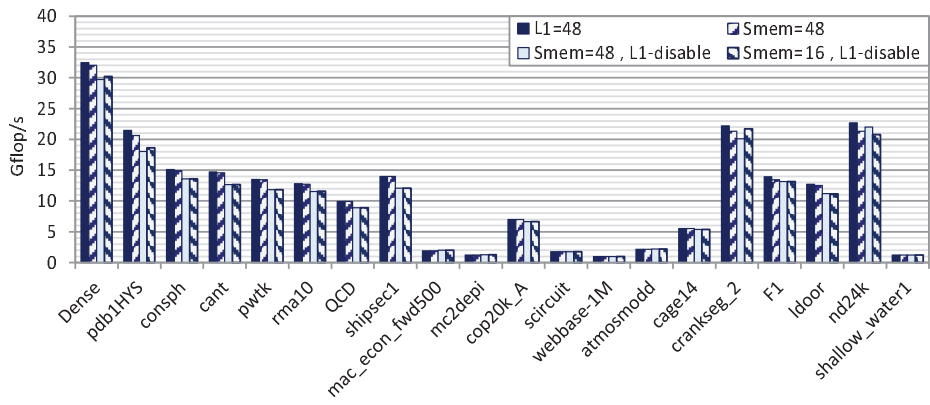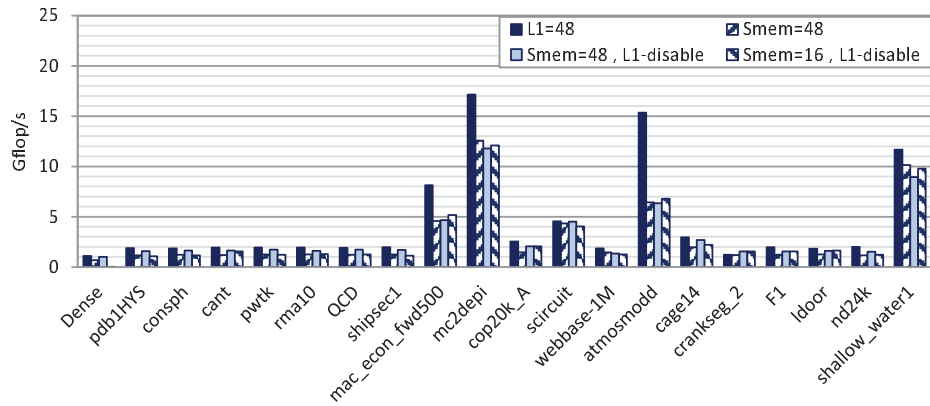

Fig A.3. The impact of different memory configuration on basic formats

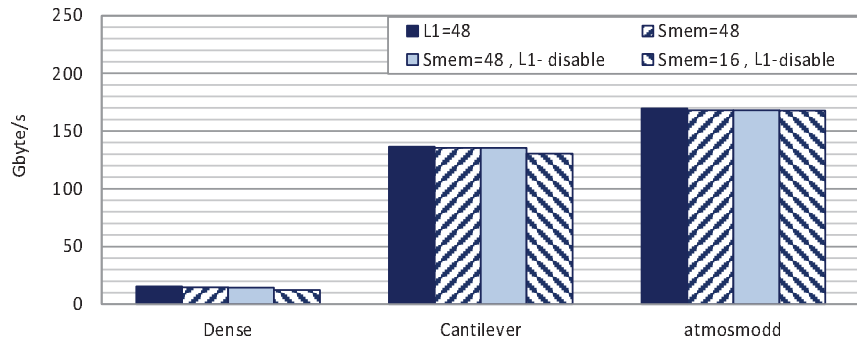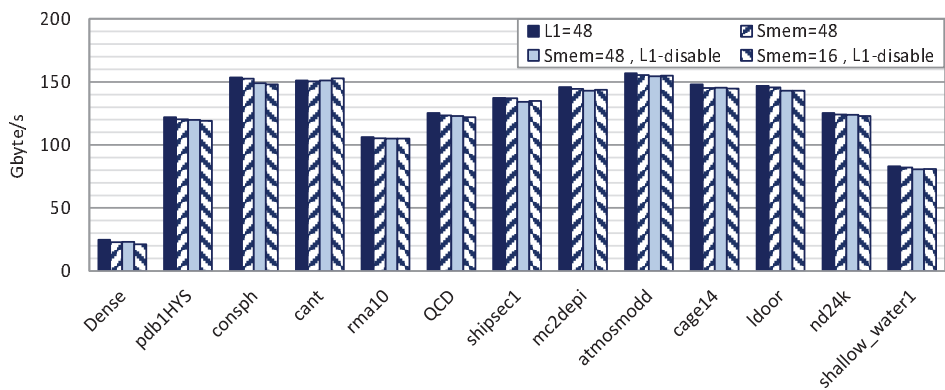

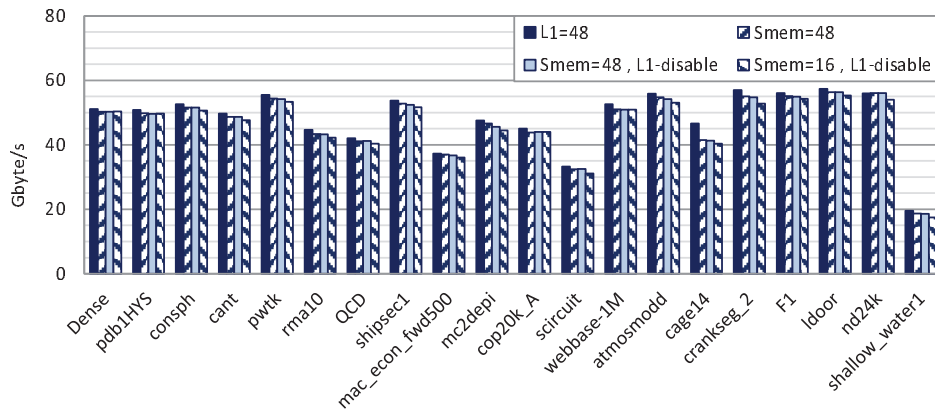

(c)COO format

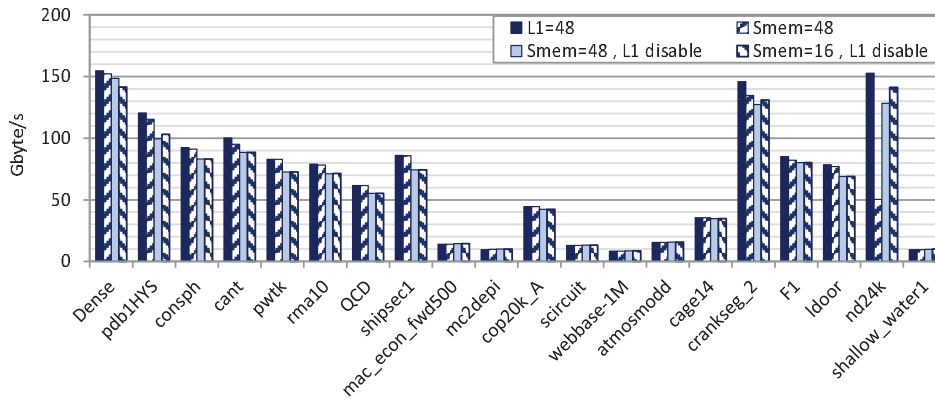

(e) CSR(vector)

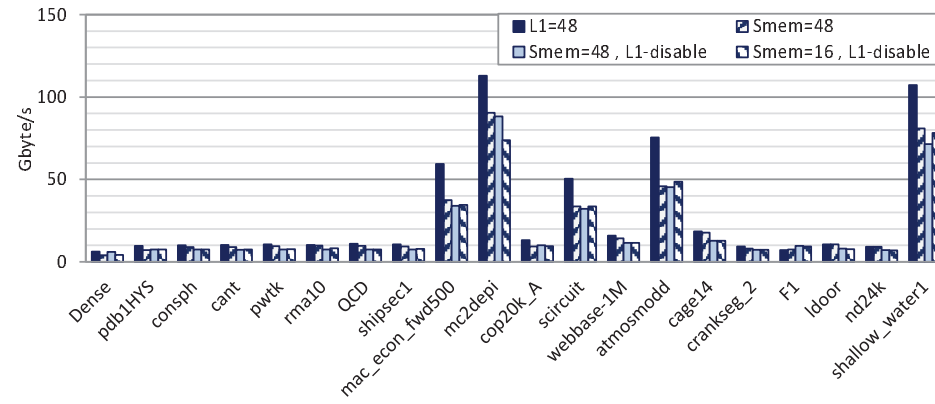

(d) CSR(scalar)

Fig A. 4. Bandwidth results for matrices with different memory configuration on basic format

## A.2 Adaptive Run-time System

In order to illustrate the practicality of our auto-tuner under Fermi architecture, Figures A.5 and A.6 show the performance of SpMV computation for various sparse matrices. The effective parameters were set based on previous experiments. In these figures, the accuracy of our system to choose a proper format is illustrated.

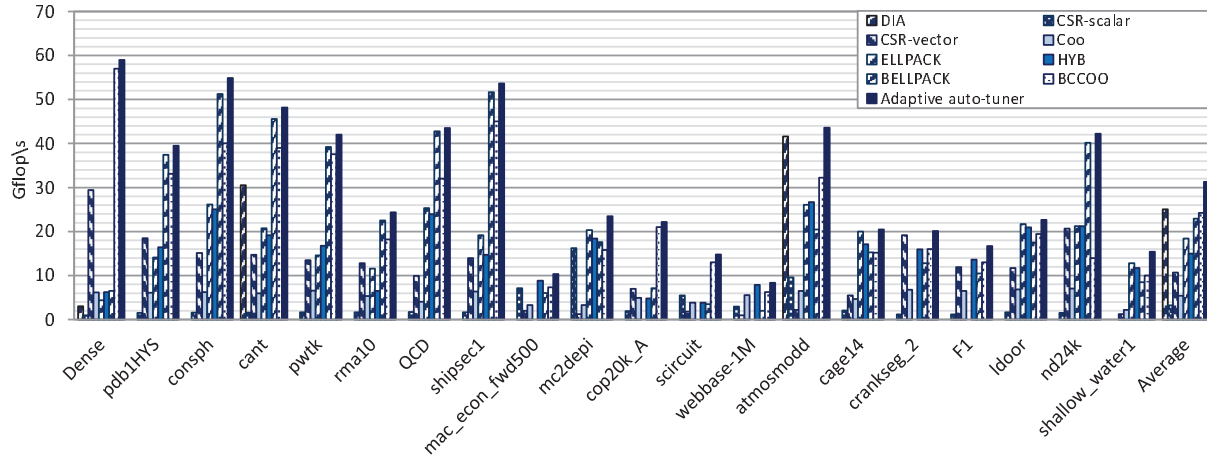

Fig A. 5. Computational power for the adaptive scheme

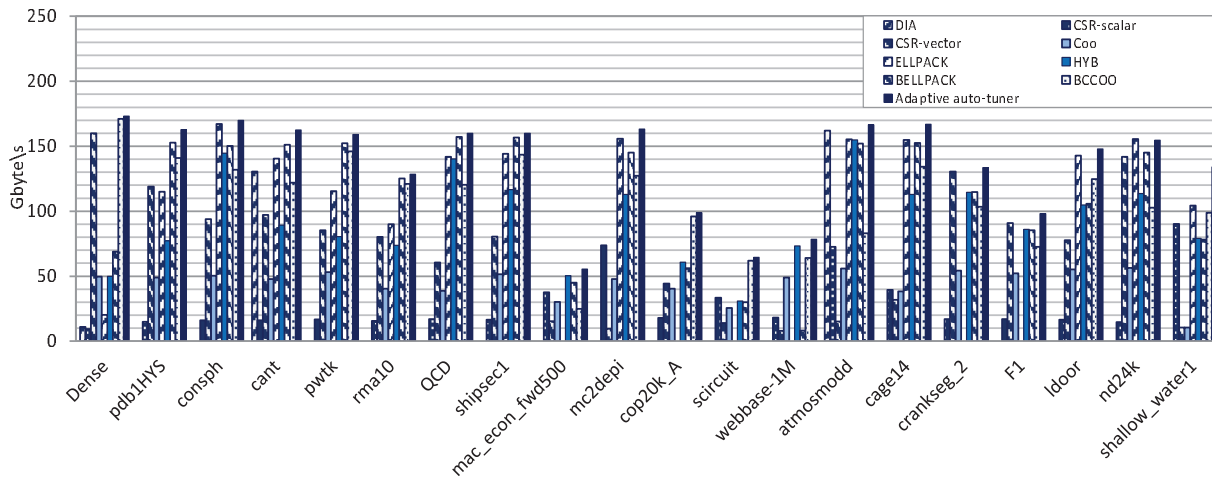

Fig A. 6. Effective bandwidth for different schemes

## References

- [1] NVIDIA. Whitepaper NVIDIA's Next Generation CUDA Compute Architecture: Fermi, 2009.
- [2] NVIDIA. Compute Visual Profiler User Guide, 2013.
- [3] NVIDIA. NVIDIA CUDA C Programming Guide, 2013.
- [4] NVIDIA Corporation. Tuning CUDA Applications for Fermi, Version 1.0, 2010.

## APPENDIX B. ANALYSES UNDER KEPLER PLATFORM

This appendix contains the results of using the proposed auto-tuner in Kepler platform.

### B.1 Experiments to Set Parameters

#### B.1.1 Block Size

The impact of block-size on the performance is shown in Fig.B.1.

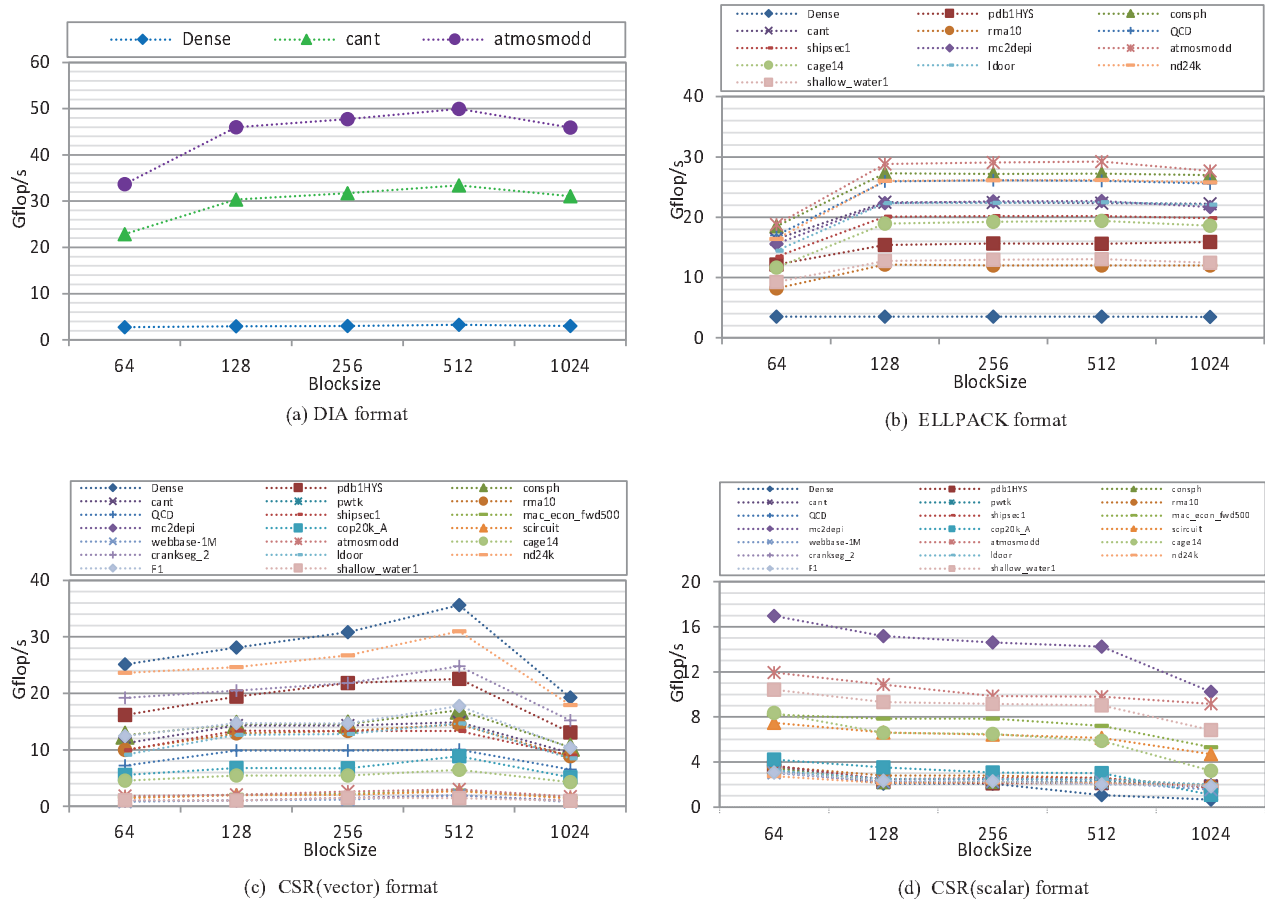

Fig B. 1. The performance achieved by basic formats for different blocks sizes



B.1.2 The Effect of the Number of Registers

Fig.B.2. shows the effect of the number of allocated registers on SpMV performance.

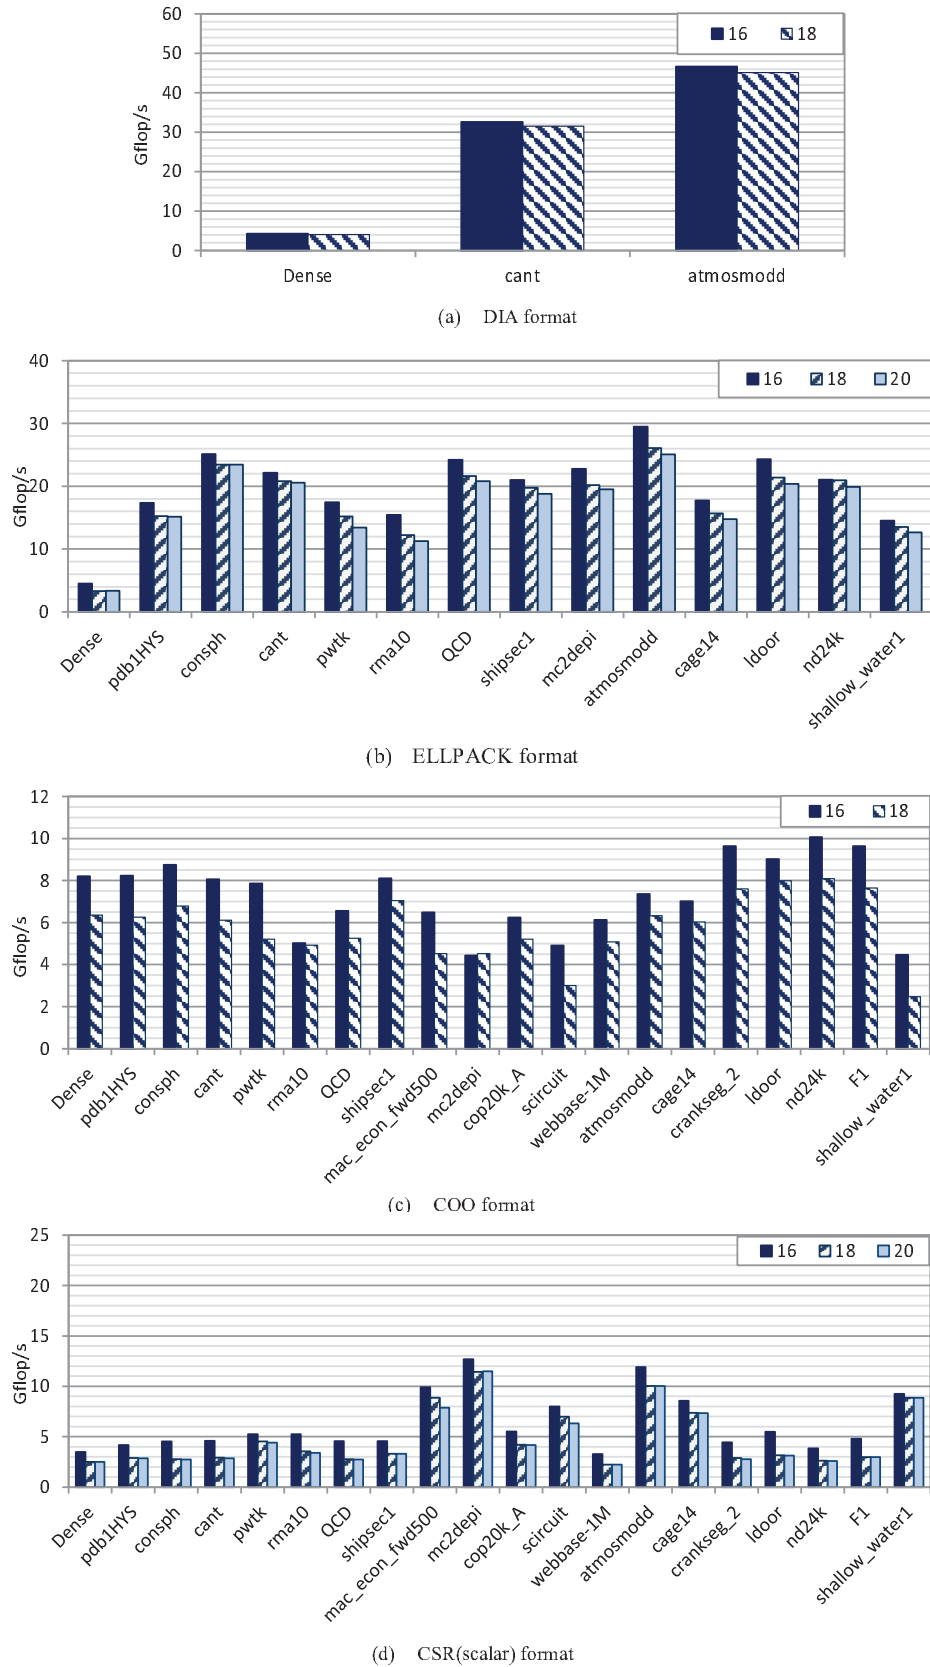

Fig B. 2. The effect of the number of registers on the performance for basic formats

### B.1.3 Memory Hierarchy

The impact of memory configuration on the performance is shown in Fig. B.3 and Fig. B.4.

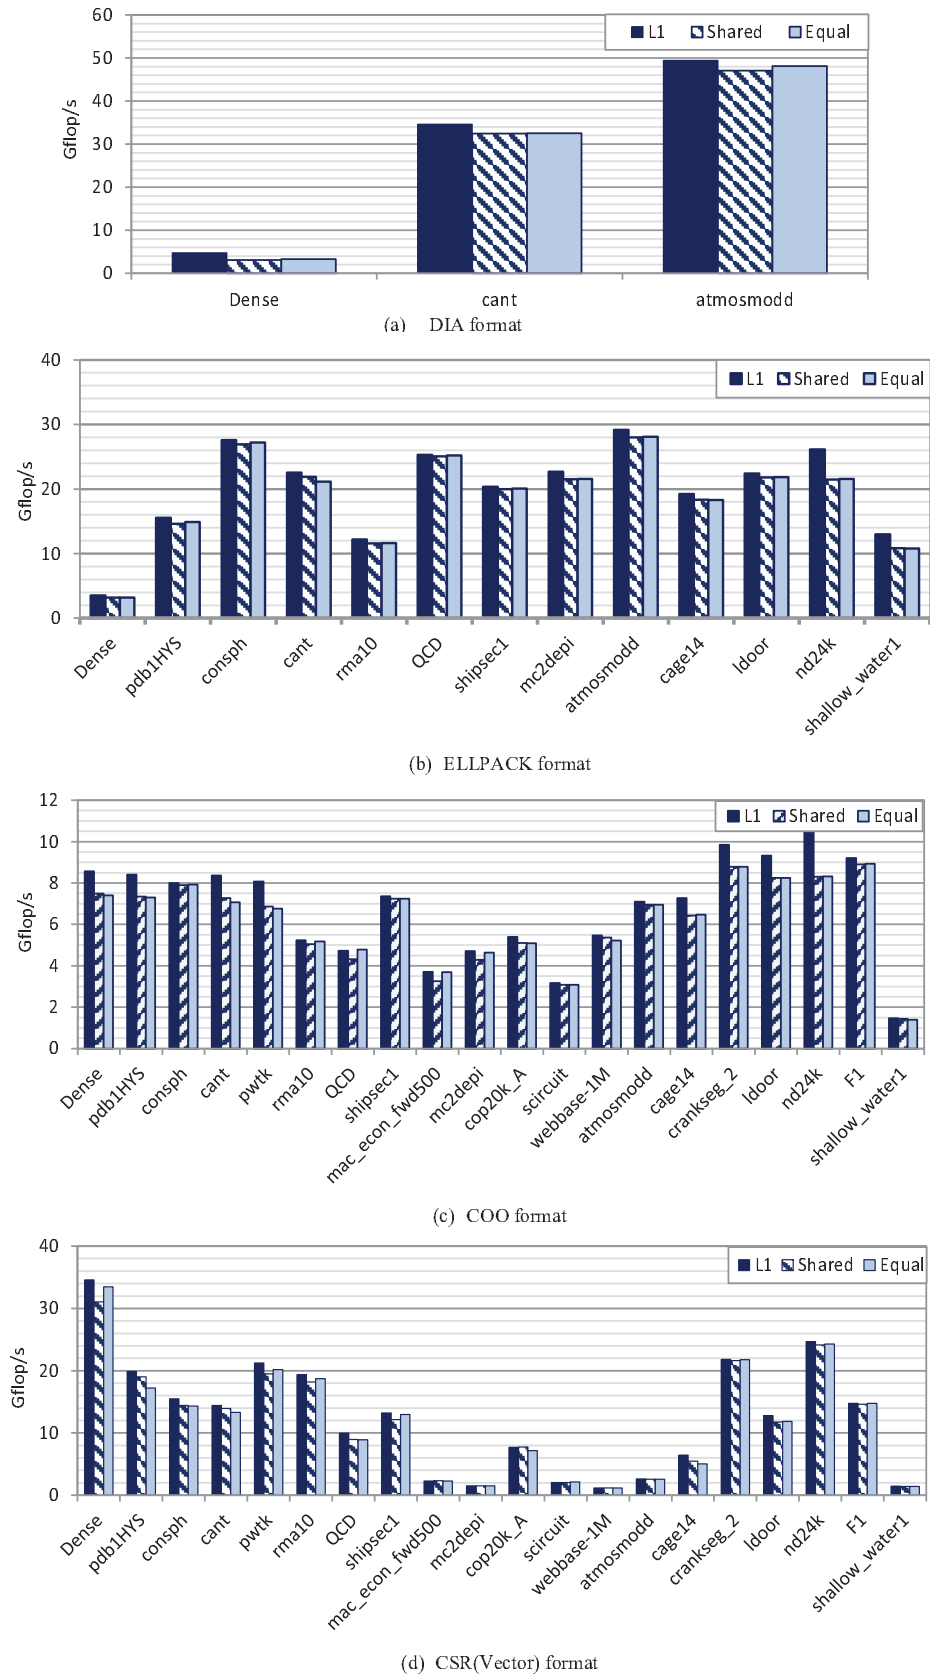

Fig B. 3. The impact of different memory configurations on the performance for different basic formats

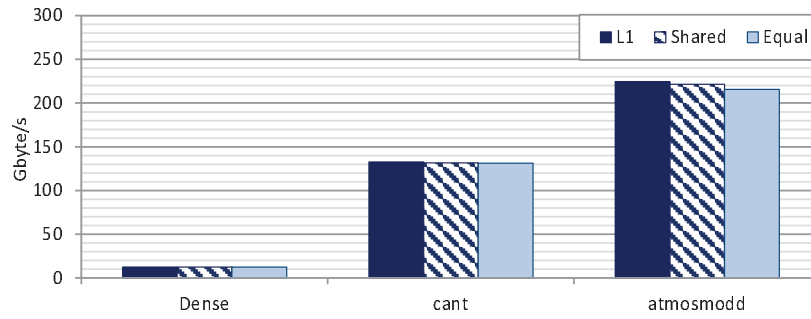

(a) DIA format

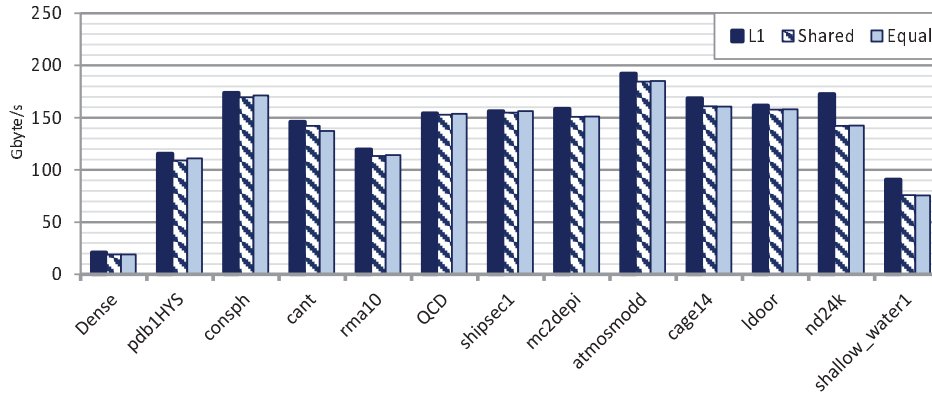

(b) ELLPack format

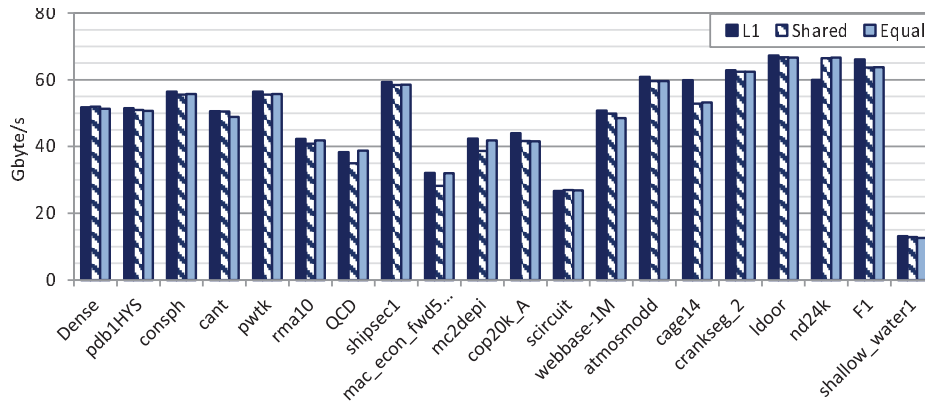

(c) COO format

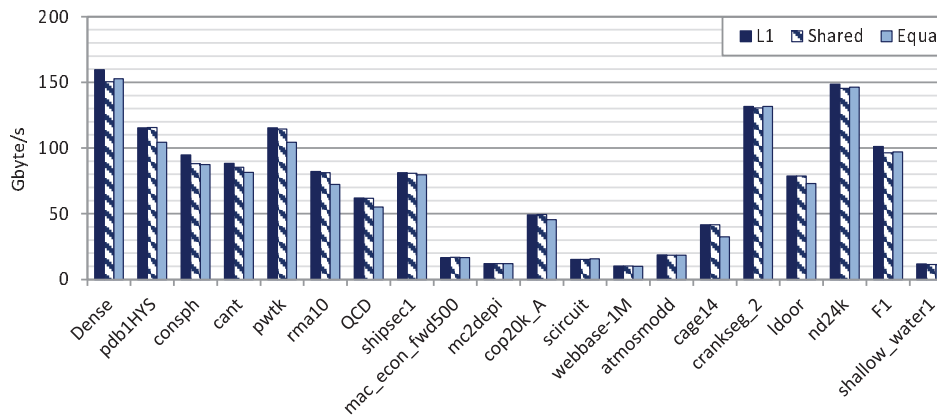

(d) CSR(vector) format

Fig B. 4. . Bandwidth results for matrices with different memory configuration for different basic formats
